# Supplementary material for: BMI Modulates the Effect of Thyroid Hormone on Lipid Profile in Euthyroid Adults
Source: Hindawi journal article supplement (doi:10.1155/2017/8591986), 2017-01-01
Supplement: f1 [file 8591986.f1.pdf]

Table S1 The interaction between BMI and thyroid parameters in modulating lipids profile

| P <sub>interaction</sub> | FT3*BMI       |        | FT4*BMI |               | TSH*BMI       |                |
|--------------------------|---------------|--------|---------|---------------|---------------|----------------|
|                          | Male          | Female | Male    | Female        | Male          | Female         |
| TG                       | 0.605         | 0.539  | 0.239   | <b>0.039*</b> | 0.429         | <b>0.001**</b> |
| CHOL                     | 0.756         | 0.466  | 0.411   | 0.547         | <b>0.036*</b> | 0.987          |
| HDL-C                    | <b>0.023*</b> | 0.203  | 0.538   | 0.127         | 0.583         | 0.083          |
| LDL-C                    | 0.420         | 0.438  | 0.119   | 0.689         | <b>0.019*</b> | 0.844          |

P for interaction results from linear regression analysis with FT3\*BMI (or FT4\*BMI, TSH\*BMI) as independent variable and lipids profile as dependent variables, after multiple adjustment for age, BMI, FT3 (or FT4, TSH). Significant associations are indicated in bold.

p<0.05 was considered statistically significant.

\*p<0.05, \*\* p<0.01, \*\*\*p<0.001
